# Supplementary material for: Insights into the interactions and dynamics of a DES formed by phenyl propionic acid and choline chloride
Source: PubMed Central journal article supplement (PMC7973556; doi:10.1038/s41598-021-85260-z), 2021-03-18
Supplement: 41598_2021_85260_MOESM1_ESM.pdf [file 41598_2021_85260_MOESM1_ESM.pdf]

# **Insights into the Interactions and Dynamics of a DES Formed by Phenyl Propionic Acid and Choline Chloride**

Parisa Jahanbakhsh Bonab<sup>1, 2</sup>, Alireza Rastkar Ebrahimzadeh<sup>2, 3</sup>, and Jaber Jahanbin Sardroodi<sup>\*, 1, 2</sup>

<sup>1</sup> Department of Chemistry, Faculty of Basic Sciences, Azarbaijan Shahid Madani University, Tabriz, Iran.

<sup>2</sup> Molecular Simulation Laboratory (MSL), Azarbaijan Shahid Madani University, Tabriz, Iran.

<sup>3</sup> Department of Physics, Faculty of Basic Sciences, Azarbaijan Shahid Madani University, Tabriz, Iran.

\* E-mail: [jsardroodi@azaruniv.ac.ir](mailto:jsardroodi@azaruniv.ac.ir)

**Table S1.** The number of Phpr and ChCl molecules in each simulation box at 293, 321 and 400 K.

| DES species \ Number of DES molecules | 300 | 600 | 1200 | 1800 |
|---------------------------------------|-----|-----|------|------|
| Phpr                                  | 201 | 402 | 804  | 1206 |
| ChCl                                  | 99  | 198 | 396  | 594  |

**Table S2.** The average lengths of simulation boxes at 293, 321 and 400 K.

| Temperature(K) \ Number of DES molecules | 300     | 600     | 1200    | 1800    |
|------------------------------------------|---------|---------|---------|---------|
| 293                                      | 40.6847 | 40.6847 | 40.6847 | 40.6847 |
| 321                                      | 40.9321 | 40.9321 | 40.9321 | 40.9321 |
| 400                                      | 41.6675 | 41.6675 | 41.6675 | 41.6675 |

**Table S3.** The partial charges and force field vdW parameter for choline chloride, ChCl.

| Atom type of ChCl                  | Partial charges of ChCl | $\epsilon_i$ (kcal/mol) | $\sigma_i$ (Å) |
|------------------------------------|-------------------------|-------------------------|----------------|
| C1, C2, C3                         | -0.10736                | 0.05500                 | 4.35           |
| H1, H2, H3, H4, H5, H6, H7, H8, H9 | 0.09544                 | 0.02200                 | 2.64           |
| N1                                 | 0.04016                 | 0.20000                 | 3.7            |
| C4                                 | -0.02576                | 0.05500                 | 4.35           |
| H10, H11                           | 0.08928                 | 0.022000                | 2.64           |
| C5                                 | 0.12008                 | 0.05500                 | 4.35           |
| H12, H13                           | 0.0408                  | 0.02200                 | 2.64           |
| O1                                 | -0.49512                | 0.152100                | 3.54           |
| H14                                | 0.3636                  | 0.046000                | 0.449          |
| Cl1                                | -0.8                    | 0.1500                  | 4.54           |

**Table S4.** The partial charges and force field vdW parameters for phenyl propionic acid, Phpr.

| Atom type of Phpr | Partial charges of Phpr | $\epsilon_i$ (kcal/mol) | $\sigma_i$ (Å) |
|-------------------|-------------------------|-------------------------|----------------|
| C                 | 0.7799                  | 0.1100                  | 4.00           |
| C1                | 0.0079                  | 0.05500                 | 4.35           |
| C2                | -0.1212                 | 0.05500                 | 4.35           |
| C3                | 0.0418                  | 0.0700                  | 3.9848         |
| C4                | -0.1212                 | 0.0700                  | 3.9848         |
| C5, C7            | -0.1905                 | 0.0700                  | 3.9848         |
| C6                | -0.0818                 | 0.0700                  | 3.9848         |
| C8                | -0.1212                 | 0.0700                  | 3.9848         |
| H, H1             | 0.0335                  | 0.02200                 | 2.64           |
| H2, H3            | 0.0568                  | 0.022000                | 2.64           |
| H4                | 0.4669                  | 0.04600                 | 0.449          |
| H5                | 0.1236                  | 0.02200                 | 2.64           |

## Figures

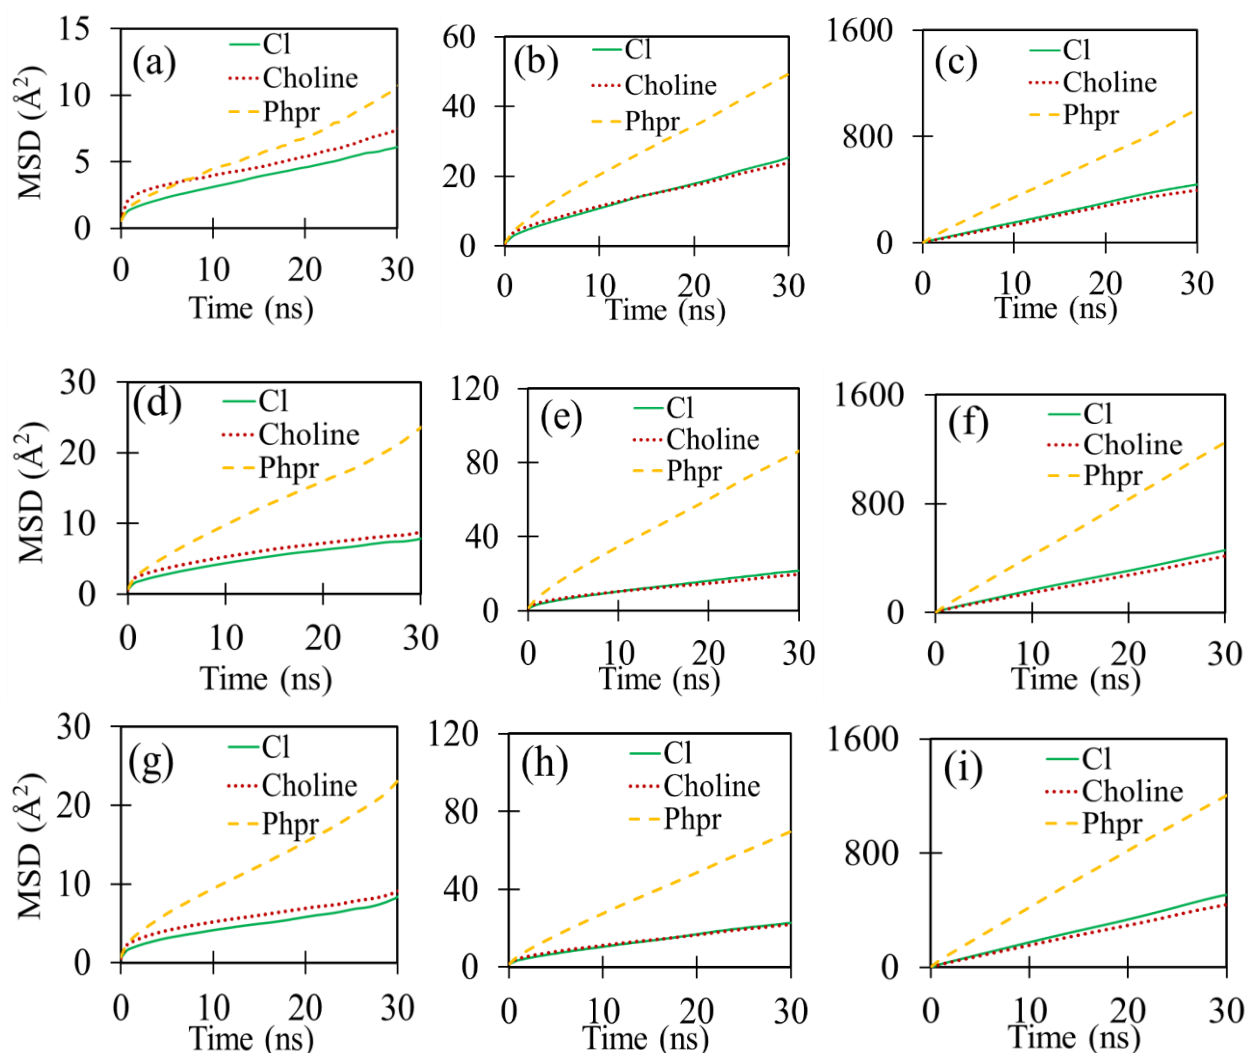

Figure S1. The comparison of mean square displacement (MSD) of DES species were calculated using the VMD package (1) for 300 DES molecules; a-c, 1200 DES molecules; d-f and 1800 DES molecules; g-i at 293 K (left panel), 300 K (middle panel) and 400 K (right panel).

## Reference

1. Humphrey, W., Dalke, A. & Schulten, K. VMD: visual molecular dynamics. *J. Mol. Graph.* 14, 33–38 (1996).
